1 **Production of Hybrid Rice seeds using environment sensitive**  
2 **genic male sterile (EGMS) and basmati rice lines in Kenya**

3 **Njiruh Paul Nthakanio**<sup>1\*</sup> <https://orcid.org/0000-0002-9876-2593>  
4 **and Kariuki Simon Njau**<sup>2</sup>

5 Current Address <sup>1</sup>Department of Agricultural Resource Management, University of Embu, Embu, Kenya,  
6 Po Box 6-60100, Embu, Kenya. Tel. +254720487126. Email: [njiruhpaul@gmail.com](mailto:njiruhpaul@gmail.com), <sup>2</sup>Department  
7 of Biochemistry and Biotechnology, Kenyatta University, Nairobi, Kenya,. Po Box 43844- 00100,  
8 Nairobi Cell Phone 0726536879. Email: [simon.njau@gmail.com](mailto:simon.njau@gmail.com).

9 **\* Corresponding author:** Email: [njiruhpaul@gmail.com](mailto:njiruhpaul@gmail.com).

10

11

12

## 13 **Abstract**

14 Photoperiod-sensitive genic male sterile rice (PGMS) lines IR-73827-23-76-15-7 S, IR-75589-31-  
15 27-8-33S referred to as P1 and P2, and IR-77271-42-25-4-36S, thermo-sensitive genic male sterile  
16 (TGMS) line referred to as T were obtained from International Rice research Institute. These lines,  
17 collectively known as environment genic male sterile lines, were sown under greenhouse growth  
18 conditions where temperatures were more than 34°C with an objective of inducing complete male  
19 gamete sterility in them. Results indicated that high temperature growth conditions induces complete  
20 male gamete sterility in both the PGMS and TGMS lines. The impact of this is that, it will be possible  
21 to produce pure basmati hybrid rice seed in the tropical regions without contamination with pure  
22 breed lines. The male sterile PGMS/TGMS were pollinated with pollen from basmati370 and 217  
23 grown under natural conditions and some hybrid seeds were obtained. This shows that high  
24 temperature emasculated the male gametes but not female ones. The conclusion is that it is possible  
25 to induce complete male gamete sterility in PGMS and TGMS under greenhouse in tropical growth  
26 conditions, and to produce hybrid rice seeds. This makes basmati hybrid rice seed production in  
27 Kenya a viable venture.

28

29 **Key words:** Basmati, Hybrid Rice, *Oryza sativa*, Male-gamete Sterility

30

31

32

33

34



## 36 **Introduction**

37 The World rice production was about 503.6million tons in 2017 (1). This is below consumption that  
38 was 505.8 million tons in the same period. In Kenya, rice consumption is over 580,000 tonnes against  
39 a total production of about 149,000 tonnes (2). The deficit, which is valued at over Kenya shillings  
40 Seven billion is imported (2). Basmati rice is preferred by many consumers compared to non-aroma  
41 varieties because of its good cooking traits (3). However, in Kenya, basmati yields only 3.6 to  
42 4.0tones per hectare (4). This is quite low and it has contributed to keeping its prices high. Over the  
43 years, rice breeding has gone through a breeding paradigms with emphasis of high yield (HYV)  
44 semi-dwarf varieties (5). The major shift came with the green revolution which brought about IR8  
45 variety in 1966 with the dwarf gene *sd-1* (6) which raised the yield to over 6 tones per hectare (7).

46 Hybrid rice technology was introduced in 1970s (8, 9) to improve yield above dwarf lines. Heterosis  
47 improved yields in rice (10, and hybrids lines are reported to have a 20-25 percent yield advantage  
48 over pure breeds (11). However, some advantages of this have been eroded by diseases such as blast  
49 (12). To overcome this, green super hybrid technology has been adopted that further increased  
50 realizable rice yield per hectare by 12% above the normal hybrids (13). Advances in green super  
51 hybrid technology started in China in 1996 and it targeted raising rice grain yield from about 10  
52 tones to about 17 tones per hectare (14). The yield was realizable by combining hybrid vigour and  
53 good agronomic traits such as disease resistance (15). According to Yuan Longping (16), rice yield  
54 in China stands at about 17 tones per hectare.

55 A number of approaches have been used in hybrid rice production that include the three line system,  
56 which utilizes cytoplasmic male sterility (CMS) (17) and the two line hybrid system that are referred

57 to as environment sensitive genic male sterility (EGMS) (18-20). Among the EGMS is the  
58 photoperiod-sensitive genic male sterile (PGMS) rice line that is completely sterile when under  
59 14hours daylight length growth conditions. It reverts to fertility in varying degree when grown under  
60 less than 14 hours daylight length conditions (18, 19). Other EGMS are thermosensitive genic male  
61 sterile (TGMS) rice lines that is sterile when grown under high temperature and revert to some  
62 fertility when grown under low temperature growth conditions (17). In their sterile phase the EGMS  
63 rice lines are crossed with a male parent to produce F<sub>1</sub> (hybrid) seeds (21).

64 Pure basmati rice yield per hectare is low compared to non-aromatic lines (22) and this has kept its  
65 prices high. Basmati370 and 217 varieties are the two major aromatic rice varieties grown in Kenya.  
66 Exploitation of hybrid technology to improve their yield is limited (23). Elsewhere, attempts to  
67 produce hybrid basmati rice lines have shown a good combining abilities in yield traits (24). In this  
68 research object was to produce basmati370 and 217 hybrid rice seeds using two line methods. The  
69 yields traits realized were better than that of both purebred lines.

## 70 **Materials and methods**

### 71 **Materials**

72 Environmental genetic male sterility (EGMS) rice varieties, used as female parents were IR-73827-  
73 23-76-15-7S (P1) and IR-75589-31-27-8-33S (P2) that are photoperiod sensitive genic male sterile  
74 (PGM), and IR-77271-42-5-4-36S (T) that is Thermosensitive genic male sterile TGMS) rice lines  
75 which were all imported from IRRI (Philippines) following Kenya Plant Health Inspectorate Service  
76 (KEPHIS) importation rules and regulations. The basmat370 and 217, used as male parents, were  
77 provided by Mwea Irrigation Agriculture Development (MIAD). Sowing was done at Kenya

78 agricultural and livestock research organization (KALRO) Mwea, which is located at latitude 0.7°S  
79 and longitude 37.37E where daylight length and night length are nearly equal (12hour).

## 80 **Methods**

### 81 **Sowing and testing for adaptability of EGMS lines**

82 Dormancy in EGMS and Basmati rice seeds was broken by submerging them in 2% H<sub>2</sub>O<sub>2</sub> for 72. A  
83 fresh change of H<sub>2</sub>O<sub>2</sub> was done after every 24 hours. Thereafter, seeds were sown in germinating  
84 plates in a nursery until seedlings were 21 days old. Transplanting of seedlings in the field was done  
85 at spacing of 20cm x 20cm in growth troughs made of concrete blocks in the greenhouse (GH).  
86 Control seedlings were sown outside the greenhouse under natural growth conditions. In each set  
87 (inside and outside GH) basmati370 and 217 varieties were sown as the pollen donor parents. The  
88 temperature in the GH was maintained to above 35°C and 20°C during the day and night times  
89 respectively. During the day temperatures in the green house was regulated downwards by and  
90 opening the door or and vents and conserved at night by closing the greenhouse. Plants were allowed  
91 to grow till flowering when high temperature treatment was stopped.

### 92 **Screening for male sterility**

93 During the first 10 days after flowering, 10 plants per variety were selected and pollen samples were  
94 taken once in every two days for pollen sterility testing. Samples from basmat370 and 217 were used  
95 as controls. Three young spikelets (picked from top, middle and bottom) from one panicle per plant  
96 were randomly selected from plants in the GH and outside GH. They were fixed in 70% alcohol.  
97 Three anthers from each spikelet were stained by placing an anther on a drop of 1% Potassium Iodine  
98 (I<sub>2</sub>KI) on a glass slide, then macerated with forceps to release pollen, followed by observations under  
99 X10 objective of a light microscope. Pollen fertility was done by counting sterile/abortive (yellow

100 and brown stained) against fertile (dark blue stained) pollen cells. The % fertile pollen (at heading)  
101 and fertile spikelets (at maturity) in plants were calculated using the equations below (17);

$$102 \text{ Pollen fertility}(\%) = \frac{\text{Total number of sterile pollen grains}}{\text{Total number of pollen grains in (fertile + unfertile)}} \times 100$$

103 **Equation 1**

$$104 \text{ Spikelet fertility}(\%) = \frac{\text{Total number of filled grains}}{\text{Total number of spikelets in (filled + unfilled)}} \times 100$$

105 **Equation 2**

## 106 **Production of hybrid rice**

107 The following crosses were made: P1 X B370, T X B370, P2 X B370, P1 X B217, T X B217 and P2  
108 X B217. This was done through crossing EGMS (♀) x Basmati (♂) to obtain F<sub>1</sub> hybrids. Pollen  
109 donors were sown outside the (GH) while female plants (P1, P2 and T) were in GH growth  
110 conditions. Sowing was staggered in three stages (from first planting September 23<sup>rd</sup>, 2012) to  
111 ensure synchrony during flowering of donor pollen with their recipient. In stage 1 only pollen donors  
112 were sown, in stage 2, ten days after stage 1, EGMS (P1, P2 and T) were sown while in stage 3, 20  
113 days after stage 1, only basmati370 and 217 (pollen donors) were sown. At critical sterility point  
114 (CRP) which is 30 days before heading, EGMS and basmati parents were exposed to high  
115 temperature under GH growth conditions till heading when female plants were pollinated with  
116 pollen from male parents. Glumes were clipped at the tips to expose the stigma then pollen from  
117 fertile basmat370 and B217 was dusted over the clipped glumes between 11.30pm and 1.30pm.  
118 Pollinated panicles were then bagged to prevent unwanted crossings.

## 119 **Evaluation of Agronomic Traits**

120 Hybrids and parental lines were planted in a complete randomised block design (3 blocks with 3  
121 replicates). All standard agronomic practises such as pest and diseases control were done. Yield

122 traits from each sampled plant were measured at the physiological maturity period. These included  
123 plant height effective tillers, 1000 seed weight, effective tillers and number of glumes per panicle  
124 were determined as described by Virmani, et al. (17). Seeds of each three sampled plants were bulked  
125 and a seed counter used to get 1000 seeds that was used to determine grain weight. Days to heading  
126 were determined at 50% emergence of panicles starting from the sowing date, while days to maturity  
127 was calculated as 30 plus days to 50% heading of each rice line. The percentage seed set rate was  
128 determined using equation below;

$$129 \quad \text{Spikelet fertility}(\%) = \frac{\text{Total number of filled grains}}{\text{Total number of spikelets in (filled + unfilled)}} \times 100$$

130 **Equation 3**

### 131 **Data analysis**

132 Data obtained on temperature, parental pollen viability, height, productive tillers, flowering date,  
133 seed setting, panicle length and exertion ANOVA was analysed using SPSS 16.0 statistical package.  
134 Numerical data of two environments was expressed in Mean±SD and analysed using students *t*-test  
135 for significance. At  $p \leq 0.05$ , mean values, were considered statistically significant.

## 136 **RESULTS**

### 137 **Induction of male sterility in EGMS varieties**

138 The temperatures in the greenhouse (GH) and outside greenhouse (OGH) growth conditions were  
139 by average 24°C and 34°C respectively. Within GH growth conditions, line P1, T and P2 recorded  
140 pollen fertility of less than 2% while basmati370 and 217 recorded 25% and 21% respectively. All  
141 lines grown under OGH conditions recorded over 60% pollen fertility (Fig 1).



142 **Fig 1: Pollen fertility under GH and OGH growth conditions.** Temperature in the green out and  
143 outside green house were constant. Scale for temperature is in degrees Celsius and pollen fertility is  
144 in %. Lines P1 and P2 stand for PGMS , line T stand for TGMS and B stand for Basmati.

145  
146 Most pollen from EGMS grown under GH growth conditions stained yellow or fading blue-black  
147 with 1% KI and their anther locules looked empty (Figs 2 a and b). This is what was classified as  
148 fertile and abortive pollen respectively (Figs 2 c and d). In the GH environment, all EGMS (P1, P2  
149 and T) pollen was either absent or deformed and stained yellow with 1% KI (Fig 2 c). Some pollen  
150 from basmati370 and 217 under GH growth conditions stained blue-black with 1% KI (Figs 2 d).

151  
152 **Fig 2: Comparison of pollen fertility (under X10 magnification) of plants grown in GH and**  
153 **OGH growth conditions.** Figs a and b that of glumes take from line B370 and EGMS (P1) under  
154 GH growth conditions respectively. Figs c and d are that of B370 and P1 grown under GH growth  
155 conditions respectively.

156  
157 The results effectiveness of GH to raise temperature and effectively induce complete sterility in  
158 EGMS and subjected to unpaired *T*-test analysis are shown in table 1. Line P1 with  $2.4 \times 10^{-11}$  had the  
159 highest pollen sterility rate compared to basmati370 with  $5.6 \times 10^{-12}$  sterility levels when grown under  
160 GH conditions. On the other hand P1 with  $6.9 \times 10^{-11}$  had lowest fertility levels compared to basmati370  
161 that had  $1.1 \times 10^{-4}$  (highest) among the parents under OGH growth conditions. However, there was  
162 no significance difference in pollen sterility under GH and OGH growth conditions among all the  
163 parental lines (Table 1a). Some F1 seeds obtained in each cross breed are as recorded in Table 2

164

165 **Table 2: Total number of F<sub>1</sub> seeds produced**

166  
167 Over 80% of anthers locules from EGMS grown outside the greenhouse conditions, were filled with  
168 conspicuous pollen grains (Fig 2a), but locules for EGMS grown under greenhouse growth  
169 conditions had no observable pollen grains (Fig 2b). The EGMS grown OGH and inside GH had  
170 their staining yellow and spikelets had no observable grains (Figs 2a and b). However, most pollen  
171 for EGMS OGH stained blue black and spikes were conspicuous filled with grain (Figs 3 c and d).

172 **Evaluation of hybrid lines**

173 Hybrids obtained from crosses between P1 x Basmati217, P1 x Basmati 370, T x Basmati217, T x  
174 Basmati370, P2 x Basmati217 and P2 x Basmati370 were coded P1B217, P1B370, TB217, TB370,  
175 P2B70 and P2B370 respectively. The hybrids were sown under GH environment where they were  
176 assessed for nine traits including number of productive tillers per hill, plant height (cm), days to 50%  
177 flowering, heading and maturity, panicle length and exertion (cm), percentage seed set and 1000  
178 grain yield per plants (grams). Evaluation was based on standard evaluation system rice (25). Mean  
179 performance of parents and hybrids indicated high genetic variability in height (HT), maturity day  
180 (MD), 1000 seeds weight (1000SW), panicle exertion (PE), total spikelets (TS) and fertile spikelets  
181 (FS) (Tables 3 and 4).

182  
183 **Table3: Evaluation yield traits of hybrids lines**

184 Values before ± sign are means of variables per plant. Means with different superscript letters within  
185 a column are significantly different (P < 0.05). N=number of plants sampled per variety. Variety

186 =VAR, N= number of plants in each sample, Height =HT, Productive tillers =PT, Heading date=HD,  
187 Days to Anthesis =DA, Maturity date=MD and 1000 seed weight =SW.

188 **Table 4: Hybrids and Parental varieties means of morphological traits.**

189 Values before  $\pm$  sign are means of variables per plant. Means with different superscript letters within  
190 a column are significantly different ( $P < 0.05$ ). SD = Standard deviation of the mean. Varieties  
191 (VAR), Panicle length (PL), Panicle exertion (PE), Total glumes (GL), Filled spikelets (FS), Sterile  
192 spikelets (SS), Percentage sterility (%S).

193  
194 Yield and morphological traits are analysed in Tables 3 and 4. Height of the cultivars, (Table 3),  
195 revealed that line T (TGMS) had  $87 \pm 0.7^b$ cm, P1 (PGMS) had  $71.9 \pm 0.6^a$ cm and P2 had  $77.8 \pm 0.6^a$ cm.  
196 Basmati217 and B370 were the tallest plants with ( $145.6 \pm 2.6^f$ ;  $140.2 \pm 2.1^f$ ) respectively. Hybrids  
197 height ranged between  $106.5 \pm 1.3^c$  cm to  $119.3 \pm 1.5^e$ cm with P2 xB370 being tallest and T x B370  
198 being the shortest (Table 4). The EGMS lines had lowest number of productive tillers (PT) while  
199 B370 had the highest ( $29.6 \pm 1.3^d$ ), and  $F_1$ 's had an average of ( $24.2 \pm 0.6^c$  to  $26.3 \pm 0.8^{cd}$ ) tillers (Table  
200 3). Among the hybrids P1x B370 recorded the highest number of PTs. Lines PGMS (P1 and P2) had  
201 longest days to heading (HD), anthesis (AD), and maturity (MD), followed by TGMS (T) and  
202 Basmati had shortest (Table 3). Hybrids lines P1xB217, P1xB370, P2xB370, P2 xB217 and TxB370  
203 had heavier seeds ranging between ( $21 \pm 0.3^{cd}$ - $23.1 \pm 0.5^e$ ) grams and also exceeding their respective  
204 parental lines. Line TxB217 had the lowest weight of  $19.2 \pm 0.1^b$ grames among hybrids. The 1000  
205 grain weight of T, P1 and P2 lines was  $17.5 \pm 1.5^a$ ,  $19.1 \pm 0.2^b$  and  $19.2 \pm 0.1^b$ , respectively and those  
206 of pollen donor basmati370 and 217 were  $20.1 \pm 0.3^{bc}$ ;  $20.1 \pm 0.4^{bc}$  respectively (Table 4). Hybrid line  
207 TB370 had the longest panicles (PL) of  $26.5 \pm 0.1^d$  followed by B370,  $25.9 \pm 0.2$ , EGMS varieties had

208 the shortest panicles, while other lines had almost similar values ranging from (24.1±0.2<sup>b</sup>to  
209 25.3±0.2<sup>c</sup>) (Tables 3 and 4).

210  
211 Lines P1, P2 and T had over 98% spikeletes sterility while basmati370 and 217, and F<sub>1</sub>'s cultivars  
212 had over 69% sterility (Table4). Hybrid lines P2B217 (56%), P1B217 (54%) and P2B370 (53%)  
213 (Table 4). had significantly lower sterility than the parents. Line P1B217 with (128.2±1.5<sup>e</sup>) had the  
214 highest number of spikelets counted. The EGMS had no measurable panicle exertion or uppermost  
215 internode. The F<sub>1</sub>'s had longest panicle exertions with uppermost internode measuring between  
216 (5.6±0.1<sup>d</sup> to 8.1±0.1<sup>f</sup>) followed by the basmati370 and 217 that had an exertion of (4.8±0.1<sup>c</sup>) and  
217 (3.8±0.1<sup>b</sup>) respectively. On average TB370 had the lowest number of spikelets among the lines  
218 followed by P1 and P2. Spikelet length of basmati, T and hybrids (P1B217, P1B370, P2B370,  
219 P2B217, and TB217) ranged between (114.3±2.1<sup>e</sup>-128.2±1.5<sup>e</sup> cm). Total glumes (GL) for B370,  
220 P1B21, P1B370 with 126.9±1.7<sup>e</sup>, 128.2±1.5<sup>e</sup>, 126.4±2.1<sup>e</sup> was significantly higher than the EGMS  
221 lines. Filled spikelets for three hybrids, P1B217, P2B217, and P2B370 with 68.5±1.2<sup>e</sup>, 69.5±1.4<sup>e</sup> and  
222 67±1.7<sup>e</sup> were significantly higher than all parents. The three had the lowest sterility percentage  
223 (Table 4).

224

## 225 **Correlating parental and hybrid phenotypic traits**

226 Phenotypic correlations among F<sub>1</sub>'s namely P1B217, P1B370, P2B370, P2B217, TB217 and TB370  
227 are shown in Table5. Plant height (PH) corrected with productive tillers and with seed weight with  
228 values of r= 0.286 and r= 0.336 respectively. Heading days positively correlated to AD and MD with

229 values of  $r = 0.986$  and  $r = 0.967$  respectively. Other positive correlations were observed between  
230 AD and MD ( $r = 0.967^{**}$ ), and PT and seed weight with  $r = 0.195$ .

231  
232 Table 5: Pearson correlation coefficients of plant height (PH), productive tillers (PT), heading day  
233 (HD), anthesis day (AD), maturity day (MD) and 1000 seed weight per plant (SW). Days to heading  
234 (HD), anthesis (AD) and maturity (MD) had high relationship in all varieties studied i.e.  $r = 0.986$  to  
235  $r = 0.967$  range. Their positive values were much close to one comparing with other parameters studied.  
236  $^{**}$ . Values in parenthesis indicate correlation is significant at the  $P < 0.01$ .

## 237 Discussion

238 Environment-sensitive genic male sterile (EGMS) rice, both PGMS and TGMS, grown under  
239 temperature higher than  $34^{\circ}\text{C}$  in the greenhouse had over 98% of their pollen staining blue-black  
240 with 1% potassium iodide (Figs 1 and 2). This is an indication that their pollen were completely  
241 male gamete sterile (26) and thus cannot have self-fertilization at this time. Therefore, EGMS can  
242 be pollinated with a pollen donor to produce hybrid seeds without adulteration from self-bred seeds.  
243 Under similar GH growth conditions basmati370 and 217 had over 20% of pollen staining blue-  
244 black, an indication that GH growth conditions could not induce complete male gamete sterility  
245 among them. The PGMS are male gamete sterile when grown under a long day of over 13.5 hours  
246 daylight length and high temperature can compensate for slightly shorter daylight length (26). In this  
247 study, PGMS were grown under GH growth and under 12hour-day length growth conditions and  
248 over 98% of pollen stained yellow in colour, an indication that they were sterile. Thus, high  
249 temperature compensated for the long day light length requirement for induction of complete pollen

250 sterility in PGMS lines P1 and P2. Yuan (19) reported that, high temperature reduces the photoperiod  
251 required to induce complete male sterility in PGMS.

252  
253 Greenhouse induced day-time temperature of above 34 °C was able to completely induce male  
254 sterility among P1, P2 and T with over 98% sterility (Tables 2-3). Many of the pollen were of  
255 abortive type and it stained yellow with 1% potassium iodide. EGMS exposed to high temperature  
256 had as low as less 2% seed set rate. It means use of staining method is accurate method of monitoring  
257 spikelet fertility. The EGMS exposed to temperature of around 24 °C under natural environment  
258 (OGH), at the time of critical sterility point, recorded some fertile pollen (Figs 3c and d). Within this  
259 temperature range EGMS revert to fertility, a time when they can propagate themselves (27, 18). For  
260 TGMS line T grown under high greenhouse (GH) temperature conditions, only 2% pollen fertility  
261 was realized. This was insignificant compared to PGMS lines P1 and P2. The results for basmati  
262 370 and 217 grown under the GH growth conditions indicated that, they had significantly higher  
263 seed set rate than EGMS (Fig 1). This is an indication that they do not have thermo/photo sensitive  
264 male sterility genes like the EGMS. Therefore, they can be used as pollen donor in hybrid rice  
265 production programme.

266  
267 Pollen sterility in lines P1, P2 and T grown under GH was over 97% and with a seed set rate of less  
268 2% (Table 4). Thus, there was an inverse correlation between pollen sterility and seed set rate. This  
269 observation is affirmed by Ku, et al. (28) who reported that TGMS and PGMS lines grown under  
270 high temperature growth condition have significantly reduced pollen fertility at  $p > 0.05$ .

271

272 Lines P1 and P2 are PGMS while T is a TGMS. PGMS sterility responds to long photoperiod day  
273 length. Temperature of over 34°C completed induced both the PGMS and TGMS to complete  
274 sterility under light day length of 12hours. This is also an indication that high temperature can  
275 effectively compensated for long-day-light length requirement by PGMS lines to realize 100%  
276 sterility. Elevated temperatures can prevent adulteration of hybrid seeds with self-bred during cross-  
277 breeding (26).

278  
279 Unpaired *t*-test results in both GH and OGH growth environments had a significance variance at  
280  $p \leq 0.05$  for days to heading (Table 5). The EGMS varieties P1 had the highest p-value followed by  
281 P2 (Table 1). Also, sterility is influenced by the level of temperature which influences the overall  
282 level of pollen viability (Fig 1). This explains why lines P1, T, and P2 did not have seeds under GH  
283 growth conditions, unlike the ones grown under natural environment, and pollen donors lines  
284 basmat370 and 217 (Figs 2 and 3).

285  
286 Lines TB217 and TB370 were better than the rest in anthesis (AD), days to heading (HD), and days  
287 to maturity (MD) (Table 3). Grain weight for P1B217, P2B217, and P1B370 was significantly higher  
288 than that of all parents. Line P1B370 had significantly higher productive tillers and panicle length  
289 than all other parents apart from B370. All hybrids had significantly larger panicle exertion than the  
290 parents. Good panicle exertion facilitates harvesting and cross pollination. Two hybrid lines P1B217  
291 and P1B370 had a significantly higher total glumes than the parents, while P1B21, P2B217 and  
292 P2B370 had better grain filling than all parents. Also, P1B217, P2B217, TB370 and P2B370  
293 recorded least sterility, better than all parents. In percentage sterility, all hybrids recorded superior  
294 performance than the best parent, a condition referred to as heterobeltiosis (29). In all other traits,

295 hybrid were intermediately between the two parents apart from glume length in TB370, with a  
296  $85.8 \pm 1.7^a$ , that was below the least performing parent.

297 All hybrids, apart from TB217 weighed heavier than EGMS and Basmati parental lines. Increase of  
298 the grain weight also increases rice yield. Heavier seeds are preferred because they are healthy with  
299 more nutrients and when planted they result to vigorous seedlings with more roots, ability to with  
300 stand harsh conditions such as drought. On the other hand, small seeds are associated with reduced  
301 seedling vigour and also, difficult for mechanical harvesting. Grain length (GL), thickness and width  
302 determine grain size. The three traits; grain length (GL), thickness and width are quantitatively  
303 inherited and controlled by several genes (30). To date, it has been possible to isolate five key genes  
304 controlling seed size in rice namely: *GS3*, *GW2*, *qSW5* or *GW5*, *GIF1* and *GS5* (31-34). Gene *GS3*  
305 has a major effect on seed length, whereas *qSW5/GW5* and *GW2* confer both the seed or grain width  
306 (GW) and weight in rice. According to Yoshida, (35) and Sirajul (36) 1000 grain weight is a stable  
307 genetic character in rice.

308  
309 Elongation of rice internodes is one of the most important traits for hybrid rice production which  
310 determines the plant height, pollination and underlies the grain yield (37). Panicle length (PL) and  
311 panicle exertion (PE) exhibited variations under greenhouse condition with hybrids performing  
312 better than parental cultivars (Table5). Panicle length and panicle exertion in rice, are driven by  
313 uppermost internode elongation linked to internode elongation gene *eui1* (37). Complete panicle  
314 exertion is under *eui1* gene and is influenced by temperature variations (38-40). Studies by Bardhan,  
315 et al. (41), Yang, et al. (38) suggest that different temperatures induce expression of male sterile  
316 gene in P(T)GMS lines at different levels. On the other side, the lower the temperature, the higher



317 the expression level of *eui gene*, and the better the panicle exertion, thus increased efficiency of  
318 cross breeding.

319  
320 Some degree of F1 sterility was observed from crosses between EGMS and Basmati lines. Thus,  
321 yield can further be increased if this issue is addressed. This type of sterility has been observed in  
322 hybrid plants from *indica* and *japonica* sub-species (16). According to Ikehashi and Araki, (5),  
323 certain *indica* and *japonica* hybrids show normal spikelet fertility in which case one or both parents  
324 possess a dominant wide-compatibility gene ( $S5^n$ ). Sterility and non-sterility is thought to be  
325 controlled by three alleles  $S-5i$  (in *indica*),  $S-5j$  (in *japonica*) and  $S-5n$  from WC rice (5, 16).  
326 According to Wan et al. (42), allelic interactions can be found at loci  $S7$ ,  $S8$ ,  $S9$ ,  $S15$  and  $S16$   
327 respectively, on chromosomes 4, 6, 7, 12 and 1. All of them cause sterility independent of each other  
328 (42). Genotypes  $S-5n/S-5i$  and  $S-5n/S-5j$  results in fertile female gametes but the  $S-5i/S-5j$  genotype  
329 produces semi-sterile panicles because of the partial abortion of female gametes, and this is what is  
330 postulated to have worked in this study as evidenced by the overall percentage seed set rate that was  
331 lower in hybrids than expected.

332  
333 Basmati370 and 217 were taller than all the maternal parents but, EGMS and the hybrids displayed  
334 intermediate heights. These results are in line with the findings of Tua, et al. (43) and Kanya, et al.  
335 (44) who reported that hybrid rice had intermediary heights compared to their parents. Nevertheless,  
336 this is affected by cultivar type, agro-ecosystems involved and the cultural agronomic practices  
337 applied (45). Production of hybrids with intermediate heights in this study is significant in that, it  
338 can be utilized to breed for plants shorter than Basmati rice hence reduced lodging.

339

## 340 **Conclusion**

341 High greenhouse temperatures of above 34°C during day time and 20°C at night can effectively  
342 emasculate both PGMS and TGMS varieties within Mwea Kenya (with 12hours of daylight length  
343 and 12hours of light length). This will allow production of basmati rice seeds in Kenya, using EGMS.  
344 Yield traits, such as grain weight showed better performance in hybrid than the best performing  
345 parent, thus, EGMS method can be used to increase yield in basmati370 and 217 through  
346 hybridization.

347

## 348 **Recommendations**

349

350 The EGMS can be tested areas of Kenya hotter than Mwea to test ability to produce hybrids outside  
351 greenhouse growth conditions.

352

353 **Acknowledgement:** National Commission of Science and Technology-Kenya (NCST)

354 who funded the research.

355

## 356 REFERENCES

- 357 1. FAO. Rice Market Monitor, FAO. 2017;
- 358 2. USAD. Foreign Agricultural service, Grain Report, Agricultural Information network, Grain and Feed
- 359 Annual. Kenya Corn, Wheat and Rice Report. 2017.

- 360 3. Hinge VR, Patil HB, and Nada AB. Aroma volatile analyses and 2AP characterization at  
361 various developmental stages in Basmati and Non-Basmati scented rice (*Oryza sativa* L.)  
362 cultivars, *Rice*. 2016; 9:38: DOI 10.1186/s12284-016-0113-6
- 363 4. Emongor RA, Mureith FM, Ndirangu SN, Kitaka DM, Walela BM. The rice value chain in  
364 Kenya with reference to rice producers. 2009; KARI; Nairobi.
- 365 5. Kikuchi F. and Ikehashi H. Semidwarfing genes of high-yielding rice varieties in Japan. *Rice*  
366 *Genetics Newsletter*. 1984; 1: 93.
- 367 6. Peng, S, Tang, S Huang, J. Zou, Y. Cui, K. Zhang, Y. He, F. Laza, RC. and. Visperas RM  
368 Accelerating Hybrid rice development, F. Xie and B. Hardy (Ed): Yield attributes and  
369 nitrogen-use efficiency of “super” hybrid rice. IRRI. 2010; 420-428.
- 370 7. Khush GS. What it will take to Feed 5.0 Billion Rice consumers in 2030, *Plant Molecular*  
371 *Biology*. 2005; 59:1–6 DOI 10.1007/s11103-005-2159-5.
- 372 8. Kropff M, Cassman K, Peng S, Matthews R, Setter T. Quantitative understanding of yield  
373 potential. In: K. Cassman, Editor. Workshop on Rice Yield Potential in Favorable  
374 Environments Los Baños, Philippine; International Rice Research Institute; 1994. pp 21-38.
- 375 9. Yuan LP. The execution and theory of developing hybrid rice. *Zhongguo Nongye Kexue*  
376 *(Chin. Agric. Sci.)* . 1977; 1:27-31.
- 377 10. Zhou G, Chen Y, Yao W, Zhang CJ, Xie WB, Hua JP, Xing JH, Xiao YZ and Zhang QF  
378 Genetic composition of yield heterosis in an elite rice hybrid. *PNAS*. 2012; 109 (39): 15847–  
379 15852.
- 380 11. Khush GS. Increasing the genetic yield potential of rice: prospects and approaches.  
381 *International Rice commission Newsletter*. 1994; 43: 1-7.

- 382 12. Wang Z, Han Q, Zi Q, Lv S, Qiu D, Zeng H Enhanced disease resistance and drought  
383 tolerance in transgenic rice plants overexpressing protein elicitors from *Magnaporthe oryzae*.  
384 PLoS ONE. 2017; 12(4): e0175734. <https://doi.org/10.1371/journal.pone.0175734>.
- 385 13. Huang M, Tang QY, Ao HJ, Zou YB. Yield potential and stability in super hybrid rice and its production  
386 Strategies. *Journal of Integrative Agriculture*. 2017; 16(5): 1009–1017.
- 387 14. Yuan LP. Progress in super-hybrid rice breeding, *The Crop Journal*. 2017; 5 :1 00 – 102
- 388 15. Zhang Q, Liu KD, Yang GP. Molecular marker diversity and hybrid sterility in indica-  
389 japonica rice crosses. *Theoretical Applied Genetics*. 1997; 95: 112-118.
- 390 16. Yan L. China's 'super hybrid' rice expected to yield 17 tons per hectare, *People's Daily*  
391 Online, April 13, 2017;.
- 392 17. Virmani SS, Sun ZX, Mou TM, Jauhar AA, Mao CX. Hybrid rice and heterosis. Two-line  
393 hybrid rice breeding manual. Los Baños (Philippines): Breeding International Rice Research  
394 Institute. 2003;.
- 395 18. Shi MS and Deng JY. The discovery, determination and utilization of the hubei  
396 Photosensitive Genic Male-sterile Rice (*Oryzasativa*subsp. japonica). *Acta Genetica Sinica*.  
397 1986; 13(2):107-112.
- 398 19. Yuan SC, Zhang ZG, He HH, Zen HL, Lu KY, Lian JH, Wang BX. Review and  
399 interpretation of two photoperiod-reactions in photoperiod-sensitive genic male-sterile rice.  
400 *Crop Science*. 1993; 33(4):651- 660.
- 401 20. Ali J, Siddiq EA, Zaman FU, Abraham MJ, Ahmed I.. Identification and characterization of  
402 temperature sensitive genic male sterility sources in rice (*Oryza sativa* L.). *Indian Journal of*  
403 *Genetics*, 1995; 55 (3): 243-259.

- 404 21. Cao L, Zhan X. Chinese Experiences in Breeding Three-Line, Two-Line and Super Hybrid  
405 Rice. INTECH, 2014; Available at: <http://creativecommons.org/licenses/by/3.0/PDF>.
- 406 22. Dela Cruz N, Khush GS. Rice grain quality evaluation procedures. In: Singh RK, Singh US,  
407 Khush GS, editors. Aromatic rice. Oxford and IBH Publishing Co: Pvt. Ltd; 2000; New  
408 Delhi, India.
- 409 23. Njiruh PN and Xue Q. Tracking the expression of photosensitive genic male sterility genes  
410 in rice. *African Journal of Biotechnology*. 2013; 12 (47): 6583-6590.
- 411 24. Faize FA, Sabar M, Awan TH, Ijaz M, Manzoor Z. Heterosis and combining ability analysis  
412 in basmati rice hybrids. 2006; *J. Anim. Pl. Sci.* 16(1-2): 56-59  
413
- 414 25. International rice research institute. Standard evaluation system for rice, 2002; pp 1-58
- 415 26. Njiruh PN and Xue Q..Programmed cell death-like behavior in photoperiodsensitive genic  
416 male sterile (PGMS) rice. *African Journal of Biotechnology*. 2011; 10(16):3027-3034.
- 417 27. Kumar P and Nautiyal MK. Two-Line Hybrid Production System and Their Applications in  
418 Rice. *International Journal of Agriculture Sciences*. 2016; 8(61):3502-3504.
- 419 28. Ku C, Kim B, Chung S.. Cytological observation of two environmental genic male sterile  
420 lines of rice. *Molecular Cell*. 2001; 12 (3):403-406.
- 421 29. Meena HS, Ram B, Kumar A, Singh BK, Meena PD, Singh VV and Singh D. Heterobeltiosis  
422 and standard heterosis for seed yield and important traits in Brassica juncea *Journal of*  
423 *Oilseed Brassica*. 2014; 5(2) 134-140.
- 424 30. Li Y, Fan C, Xing Y, Jiang Y, Luo L, Sun L, Shao D, Xu C, Li X, Xiao J, He Y, Zhang Q.  
425 Natural variation in GS5 plays an important role in regulating grain size and yield in rice.  
426 *Nature Genetics*. 2011; doi:10.1038/ng.977.

- 427 31. Fan C, Xing Y, Mao H, Lu T, Han B, Xu C, Li X, Zhang Q. GS3, a major QTL for grain  
428 length and weight and minor QTL for grain width and thickness in rice, encodes a putative  
429 transmembrane protein. *Theoretical Application Genetics*. 2006; 112: 1164–1171.
- 430 32. Song XJ, Huang W, Shi M, Zhu MZ, Lin HX. A QTL for rice grain width and weight encodes  
431 a previously unknown RING-type E3 ubiquitin ligase. *Nature Genetics* 39. 2007; 623–630.
- 432 33. Shomura A, Izawa T, Ebana K, Ebitani T, Kanegae H, Konishi S, Yano M. Deletion in a  
433 gene associated with grain size increased yields during rice domestication. *Nature Genetics*,  
434 2008; 40: 1023–1028.
- 435 34. Weng JF, Gu SH, Wan XY, Gao H, Guo T, Su N, Lei CL, Zhang X, Cheng ZJ, Guo XP,  
436 Yang Z, Sun X, Wang S, Zhang Q. Genetic and physical mapping of a new gene for bacterial  
437 blight resistance in rice. *Theoretical Applied Genetics*, 2003; 106: 467–1472.
- 438 35. Yoshida S. *Fundamentals of Rice Crop Science*. Los Baños, Leguna, Philippines:  
439 International Rice Research Institute: 1981; pp 269.
- 440 36. Sirajul MI, Shaobing P, Romeo MV, Sultan MU, Hossain, SM, Julfikar AW. Comparative  
441 study on yield and yield attributes of hybrid, inbred, and npt rice genotypes in a tropical  
442 irrigated ecosystem. *Bangladesh Journal of Agricultural Research*. 2010; 35(2): 343-353.
- 443 37. Huihai X, Youwei Y, Chunxia C, Jingzhen C. Elongation of the uppermost internode for  
444 Shuangdi Pei164s, TGMS rice with *eui* gene. *African Journal of Agricultural Research*. 2012;  
445 26: 3806-3812.
- 446 38. Hittalmani S, Huang N, Courtois B, Venuprasad R, Shashidhar HE, Zhuang JY, Zheng KL,  
447 Liu GF, Wang GC, SidhuJS, et al. Identification of QTL for growth- and grain yield-related  
448 traits in rice across nine locations of Asia; *Theoretical and Applied Genetics*. 2003; 107:679–  
449 690.

- 450 39. Yang Z, Sun X, Wang S, Zhang Q. Genetic and physical mapping of a new gene for bacterial  
451 blight resistance in rice. *Theoretical Applied Genetics*, 2003; 106: 467–1472.
- 452 40. Ma A, Nawab NN, Abbas A, Zulkiffal M, Sajjad M. Evaluation of selection criteria in  
453 *Cicerarietinum L.* using correlation coefficients and path analysis. *Australian Journal of Crop*  
454 *Science*. 2009; 3: 65-70.
- 455 41. Bardhan RSK, Pateña GF, Vergara BS. Feasibility of selection for traits associated with cold  
456 tolerance in rice under rapid generation advance method. *Euphytica*, 1982; 31: 25-31.
- 457 42. Wan J, Yamaguchi Y, Kato H, Ikehashi H. Two new loci for hybrid sterility in cultivated rice (*Oryza*  
458 *sativa L.*). 1996; *Theoretical and Applied Genetics*, 92: 183–190.
- 459 43. Tua S, Luana L, Liua Y, Longa W, Konga F, Hea T. Production and heterosis analysis of  
460 rice autotetraploid hybrids. 2007; *Crop Science*, 47, 2356-2363.
- 461 44. Kanya JI, Njiruh NP, Kimani JM, Wajogu RK, Kariuki SN Evaluation of photoperiod and  
462 thermosensitive genic male sterile lines for hybrid rice seeds production in Kenya.  
463 *International Journal of Agronomy and Agricultural Research (IJAAR)*. (2013) 3 (2):21-39.  
464 SSN 22237054 Dio-22253610.
- 465 45. Zafar N, Aziz S, Masod S. Phenotypic divergence for agro-morphological traits among  
466 landrace genotypes of rice (*Oryzasativa L.*) from Pakistan. *International Journal of*  
467 *Agriculture and Biology*. 2004; 2: 335–339.
- 468

**Table 1: Unpaired T-test analysis of % viable/fertile and sterility pollen.** Table 1a shows pollen sterility under greenhouse environment (GH) while table 1b shows pollen fertility under outside greenhouse (OGH) or natural growth conditions. Abbreviations P, T, P and B stand from PGMS, TGMS and basmati respectively.

a

| Varieties | GH growth condntions        | T-test values         | p-value (0.05) |
|-----------|-----------------------------|-----------------------|----------------|
| P1        | Percentage pollen sterility | $2.4 \times 10^{-11}$ | 0.0001         |
| T         | Percentage pollen sterility | $1.6 \times 10^{-10}$ | 0.0001         |
| P2        | Percentage pollen sterility | $3.3 \times 10^{-11}$ | 0.0001         |
| B217      | Percentage pollen sterility | $5.6 \times 10^{-12}$ | 0.0001         |
| B370      | Percentage pollen sterility | $3.9 \times 10^{-12}$ | 0.0001         |

bioRxiv preprint doi: <https://doi.org/10.1101/755306>; this version posted September 3, 2019. The copyright holder for this preprint (which was not certified by peer review) is the author/funder, who has granted bioRxiv a license to display the preprint in perpetuity. It is made available under aCC-BY 4.0 International license.

b

| Varieties | OGH growth condntions       | T-test values         | p-value (0.05) |
|-----------|-----------------------------|-----------------------|----------------|
| P1        | Percentage pollen fertility | $6.9 \times 10^{-11}$ | 0.0001         |
| T         | Percentage pollen fertility | $5.7 \times 10^{-8}$  | 0.0001         |
| P2        | Percentage pollen fertility | $1.3 \times 10^{-8}$  | 0.0001         |
| B217      | Percentage pollen fertility | $2.5 \times 10^{-5}$  | 0.0001         |
| B370      | Percentage pollen fertility | $1.1 \times 10^{-4}$  | 0.0001         |

**Table2: Total number of F<sub>1</sub> seeds produced.**

| Line | P1  | P2  | T1  |
|------|-----|-----|-----|
| B217 | 175 | 620 | 225 |
| B370 | 599 | 411 | 299 |



**Table3: Evaluation of yield traits of hybrids lines**

Values before  $\pm$  sign are means of variables per plant. Means with different superscript letters within a column are significantly different ( $P < 0.05$ ). N=number of plants sampled per variety. Variety =VAR, N= number of plants in each sample, Height =HT, Productive tillers =PT, Heading date=HD, Days to Anthesis =DA, Maturity date=MD and 1000 seed weight =SW.

| VAR           | N  | HT(cm)                        | PT<br>(number)               | HD<br>(days)                 | DA<br>(days)                   | MD<br>(days)                  | 1000 grain<br>SW (g)         |
|---------------|----|-------------------------------|------------------------------|------------------------------|--------------------------------|-------------------------------|------------------------------|
| <i>PI</i>     | 92 | 71.9 $\pm$ 0.6 <sup>a</sup>   | 19.7 $\pm$ 0.7 <sup>ab</sup> | 110.2 $\pm$ 0.7 <sup>b</sup> | 112.7 $\pm$ 1.3 <sup>e</sup>   | 140.1 $\pm$ 0.7 <sup>d</sup>  | 19.1 $\pm$ 0.2 <sup>b</sup>  |
| <i>T</i>      | 94 | 87 $\pm$ 0.7 <sup>b</sup>     | 18.4 $\pm$ 0.8 <sup>a</sup>  | 99.1 $\pm$ 0.3 <sup>bc</sup> | 101.7 $\pm$ 0.3 <sup>bcd</sup> | 129.3 $\pm$ 0.3 <sup>bc</sup> | 17.5 $\pm$ 1.5 <sup>a</sup>  |
| <i>P2</i>     | 90 | 77.8 $\pm$ 0.6 <sup>a</sup>   | 22.7 $\pm$ 0.6 <sup>bc</sup> | 114 $\pm$ 0.6 <sup>e</sup>   | 116.8 $\pm$ 0.6 <sup>f</sup>   | 144.2 $\pm$ 0.6 <sup>e</sup>  | 19.2 $\pm$ 0.1 <sup>b</sup>  |
| <i>B217</i>   | 91 | 115.6 $\pm$ 2.6 <sup>cf</sup> | 25.4 $\pm$ 0.9 <sup>c</sup>  | 99.5 $\pm$ 0.5 <sup>b</sup>  | 102.4 $\pm$ 0.5 <sup>cd</sup>  | 129.8 $\pm$ 0.5 <sup>bc</sup> | 20.1 $\pm$ 0.3 <sup>bc</sup> |
| <i>B370</i>   | 92 | 140.2 $\pm$ 2.1 <sup>f</sup>  | 29.6 $\pm$ 1.3 <sup>d</sup>  | 100.8 $\pm$ 0.4 <sup>c</sup> | 103.2 $\pm$ 0.5 <sup>d</sup>   | 130.8 $\pm$ 0.4 <sup>c</sup>  | 20.1 $\pm$ 0.4 <sup>bc</sup> |
| <i>PIB217</i> | 90 | 115.2 $\pm$ 1.6 <sup>de</sup> | 25.5 $\pm$ 0.7 <sup>c</sup>  | 100 $\pm$ 0.4 <sup>bc</sup>  | 101.5 $\pm$ 0.4 <sup>bcd</sup> | 130.2 $\pm$ 0.4 <sup>bc</sup> | 22.2 $\pm$ 0.1 <sup>de</sup> |
| <i>TB217</i>  | 92 | 107.8 $\pm$ 1.1 <sup>c</sup>  | 24.2 $\pm$ 0.6 <sup>c</sup>  | 86 $\pm$ 0.2 <sup>a</sup>    | 87.5 $\pm$ 0.2 <sup>a</sup>    | 116.1 $\pm$ 0.2 <sup>a</sup>  | 19.2 $\pm$ 0.1 <sup>b</sup>  |
| <i>P2B217</i> | 93 | 116.9 $\pm$ 1.6 <sup>e</sup>  | 25.6 $\pm$ 0.7 <sup>c</sup>  | 98.2 $\pm$ 0.3 <sup>b</sup>  | 99.7 $\pm$ 0.3 <sup>b</sup>    | 128.2 $\pm$ 0.3 <sup>b</sup>  | 22.2 $\pm$ 0.4 <sup>de</sup> |
| <i>PIB370</i> | 96 | 109.5 $\pm$ 1.8 <sup>cd</sup> | 26.3 $\pm$ 0.8 <sup>cd</sup> | 99.5 $\pm$ 0.4 <sup>bc</sup> | 100.8 $\pm$ 0.4 <sup>bcd</sup> | 129.7 $\pm$ 0.4 <sup>bc</sup> | 23.1 $\pm$ 0.5 <sup>e</sup>  |
| <i>TB370</i>  | 95 | 106.5 $\pm$ 1.3 <sup>c</sup>  | 24.8 $\pm$ 1 <sup>c</sup>    | 87.9 $\pm$ 0.2 <sup>a</sup>  | 89.1 $\pm$ 0.2 <sup>a</sup>    | 117.9 $\pm$ 0.2 <sup>a</sup>  | 21 $\pm$ 0.3 <sup>cd</sup>   |
| <i>P2B370</i> | 92 | 119.3 $\pm$ 1.5 <sup>e</sup>  | 24.4 $\pm$ 0.7 <sup>c</sup>  | 99 $\pm$ 0.6 <sup>bc</sup>   | 100.4 $\pm$ 0.5 <sup>bc</sup>  | 128.6 $\pm$ 0.6 <sup>bc</sup> | 22.7 $\pm$ 0.2 <sup>e</sup>  |

bioRxiv preprint doi: <https://doi.org/10.1101/755316>; this version posted September 3, 2019. The copyright holder for this preprint (which was not certified by peer review) is the author/funder, who has granted bioRxiv a license to display the preprint in perpetuity. It is made available under aCC-BY 4.0 International license.

**Table 4: Hybrids and Parental varieties means of morphological traits.**

Values before  $\pm$  sign are means of variables per plant. Means with different superscript letters within a column are significantly different ( $P < 0.05$ ). SD = Standard deviation of the mean. Varieties (VAR), Panicle length (PL), Panicle exertion (PE), Total glumes (GL), Filled spikelets (FS), Sterile spikelets (SS), Percentage sterility (%S).

| VAR           | N   | PL(cm)                       | PE(cm)                     | GL                            | FS<br>(grains)              | SS                            | %S                          |
|---------------|-----|------------------------------|----------------------------|-------------------------------|-----------------------------|-------------------------------|-----------------------------|
| <i>PI</i>     | 276 | 18.8 $\pm$ 0.2 <sup>a</sup>  | 0.1 $\pm$ 0 <sup>a</sup>   | 90 $\pm$ 1.8 <sup>b</sup>     | 0.7 $\pm$ 0.3 <sup>a</sup>  | 89.2 $\pm$ 1.8 <sup>ef</sup>  | 99.3 $\pm$ 0.3 <sup>d</sup> |
| <i>T</i>      | 282 | 23.5 $\pm$ 0.2 <sup>b</sup>  | 0 $\pm$ 0 <sup>a</sup>     | 116 $\pm$ 1.9 <sup>cd</sup>   | 1.7 $\pm$ 0.4 <sup>a</sup>  | 114.3 $\pm$ 1.8 <sup>g</sup>  | 98.9 $\pm$ 0.3 <sup>d</sup> |
| <i>P2</i>     | 270 | 19.2 $\pm$ 0.1 <sup>a</sup>  | 0 $\pm$ 0 <sup>a</sup>     | 96.3 $\pm$ 1.5 <sup>b</sup>   | 0 $\pm$ 0 <sup>a</sup>      | 96.3 $\pm$ 1.6 <sup>f</sup>   | 100 $\pm$ 0 <sup>d</sup>    |
| <i>B217</i>   | 273 | 25.3 $\pm$ 0.2 <sup>c</sup>  | 4.8 $\pm$ 0.1 <sup>c</sup> | 122.9 $\pm$ 2 <sup>cde</sup>  | 37.1 $\pm$ 1.4 <sup>b</sup> | 85.8 $\pm$ 2 <sup>e</sup>     | 69.5 $\pm$ 1.1 <sup>c</sup> |
| <i>B370</i>   | 282 | 25.9 $\pm$ 0.2 <sup>cd</sup> | 3.8 $\pm$ 0.1 <sup>b</sup> | 126.9 $\pm$ 1.7 <sup>e</sup>  | 34.3 $\pm$ 1.3 <sup>b</sup> | 92.7 $\pm$ 1.9 <sup>ef</sup>  | 72.6 $\pm$ 1.1 <sup>c</sup> |
| <i>PIB217</i> | 270 | 25.3 $\pm$ 0.1 <sup>c</sup>  | 5.9 $\pm$ 0.1 <sup>d</sup> | 128.2 $\pm$ 1.5 <sup>e</sup>  | 68.5 $\pm$ 1.2 <sup>e</sup> | 59.7 $\pm$ 1.2 <sup>abc</sup> | 46.4 $\pm$ 0.7 <sup>a</sup> |
| <i>TB217</i>  | 273 | 25.6 $\pm$ 0.1 <sup>c</sup>  | 8.1 $\pm$ 0.1 <sup>f</sup> | 115.9 $\pm$ 1.4 <sup>c</sup>  | 49.4 $\pm$ 1 <sup>d</sup>   | 66.5 $\pm$ 1.4 <sup>cd</sup>  | 57 $\pm$ 0.8 <sup>b</sup>   |
| <i>P2B217</i> | 279 | 24.1 $\pm$ 0.2 <sup>b</sup>  | 5.7 $\pm$ 0.1 <sup>d</sup> | 124.6 $\pm$ 1.9 <sup>de</sup> | 69.5 $\pm$ 1.4 <sup>e</sup> | 54.6 $\pm$ 1.1 <sup>a</sup>   | 44.4 $\pm$ 0.7 <sup>a</sup> |
| <i>PIB370</i> | 279 | 25.2 $\pm$ 0.2 <sup>c</sup>  | 6.8 $\pm$ 0.3 <sup>e</sup> | 126.4 $\pm$ 2.1 <sup>e</sup>  | 53.6 $\pm$ 2 <sup>d</sup>   | 72.8 $\pm$ 1.8 <sup>d</sup>   | 58.8 $\pm$ 1.1 <sup>b</sup> |
| <i>TB370</i>  | 285 | 26.5 $\pm$ 0.1 <sup>d</sup>  | 6.7 $\pm$ 0.1 <sup>e</sup> | 85.8 $\pm$ 1.7 <sup>a</sup>   | 42.9 $\pm$ 1 <sup>c</sup>   | 63.6 $\pm$ 1.4 <sup>bc</sup>  | 59.6 $\pm$ 0.7 <sup>b</sup> |

|               |     |                     |                      |                        |                     |                        |                       |
|---------------|-----|---------------------|----------------------|------------------------|---------------------|------------------------|-----------------------|
| <i>P2B370</i> | 282 | 24±0.1 <sup>b</sup> | 5.6±0.1 <sup>d</sup> | 114.3±2.1 <sup>c</sup> | 67±1.7 <sup>e</sup> | 58.9±1.1 <sup>ab</sup> | 47.5±0.7 <sup>a</sup> |
|---------------|-----|---------------------|----------------------|------------------------|---------------------|------------------------|-----------------------|

Table 5: Pearson correlation coefficients of plant height (PH), productive tillers (PT), heading day (HD), anthesis day (AD), maturity day (MD) and 1000 seed weight per plant (SW). Days to heading (HD), anthesis (AD) and maturity (MD) had high relationship in all varieties studied i.e.  $r=0.986$  to  $r=0.967$  range. Their positive values were much close to one comparing with other parameters studied.

\*\* . Values in parenthesis indicate correlation is significant at the  $P<0.01$ .

|    | PH | PT     | HD      | AD      | MD      | SW      |
|----|----|--------|---------|---------|---------|---------|
| PH | 1  | .286** | -.296** | -.295** | -.298** | .336**  |
| PT |    | 1      | -.109** | -.117** | -.109** | .195**  |
| HD |    |        | 1       | .986**  | .980**  | -.126** |
| AD |    |        |         | 1       | .967**  | -.167** |
| MD |    |        |         |         | 1       | -.125** |
| SW |    |        |         |         |         | 1       |

bioRxiv preprint doi: <https://doi.org/10.1101/2019.09.03.285306>; this version posted September 3, 2019. The copyright holder for this preprint (which was not certified by peer review) is the author/funder, who has granted bioRxiv a license to display the preprint in perpetuity. It is made available under aCC-BY 4.0 International license.

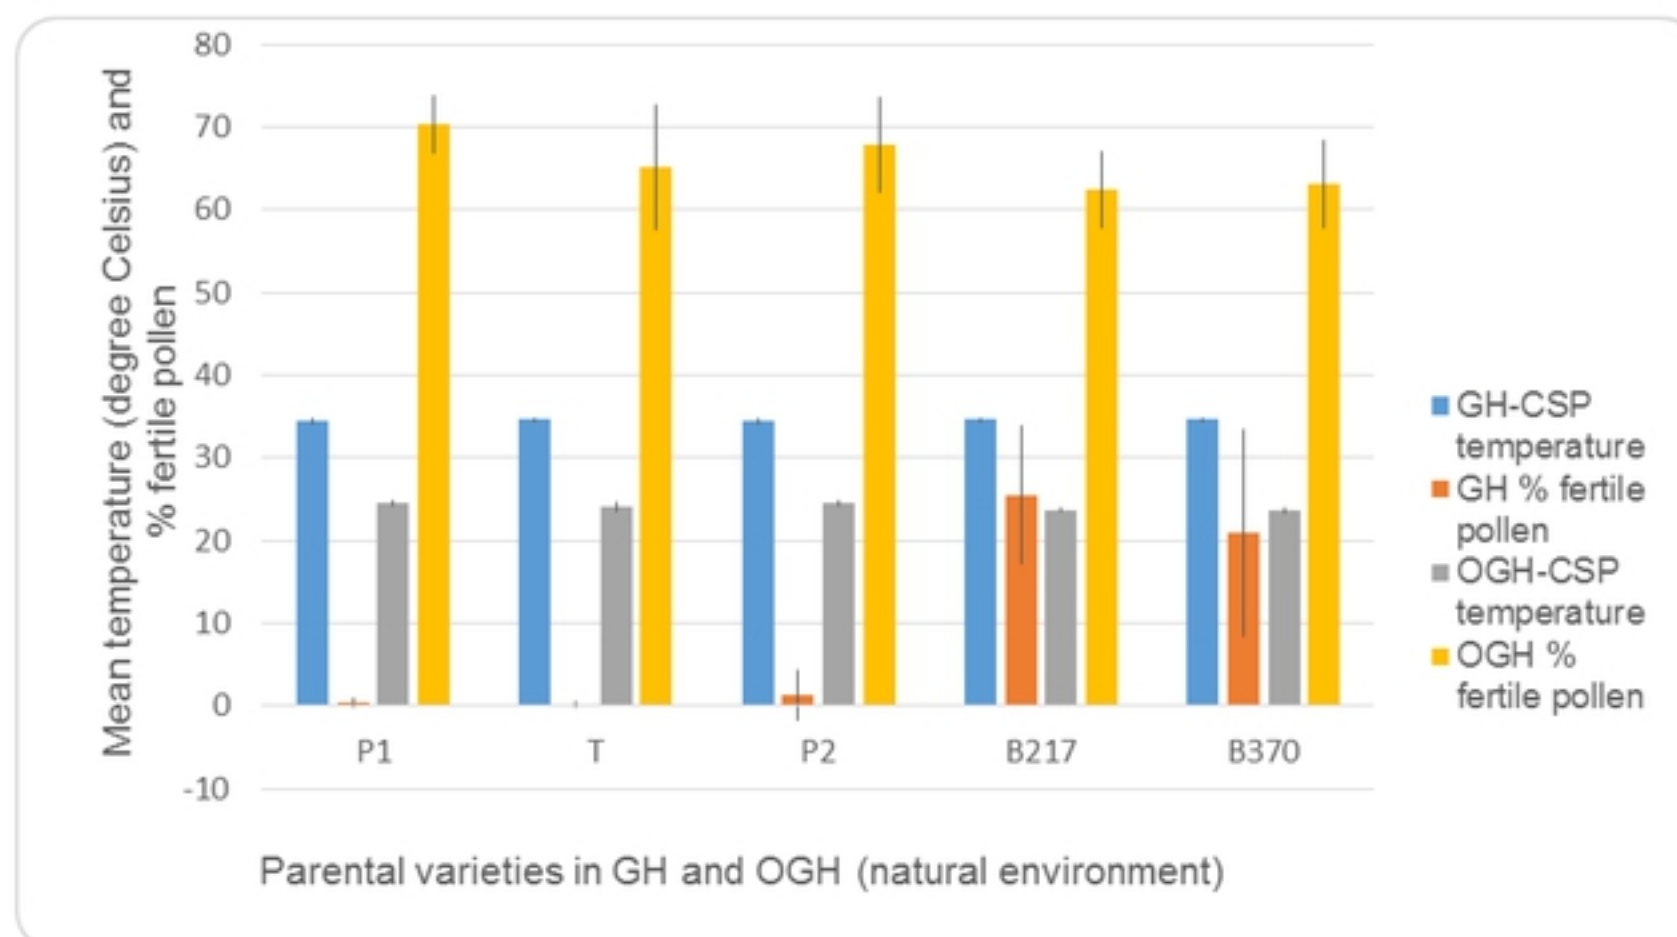

Fig 1: Pollen fertility under GH and OGH growth conditions. Temperature in the green out and outside green house were constant. Scale for temperature is in degrees Celsius and pollen fertility is in %. Lines *P1* and *P2* stand for PGMS, line *T* stand for TGMS and *B* stand for *Basmati*.



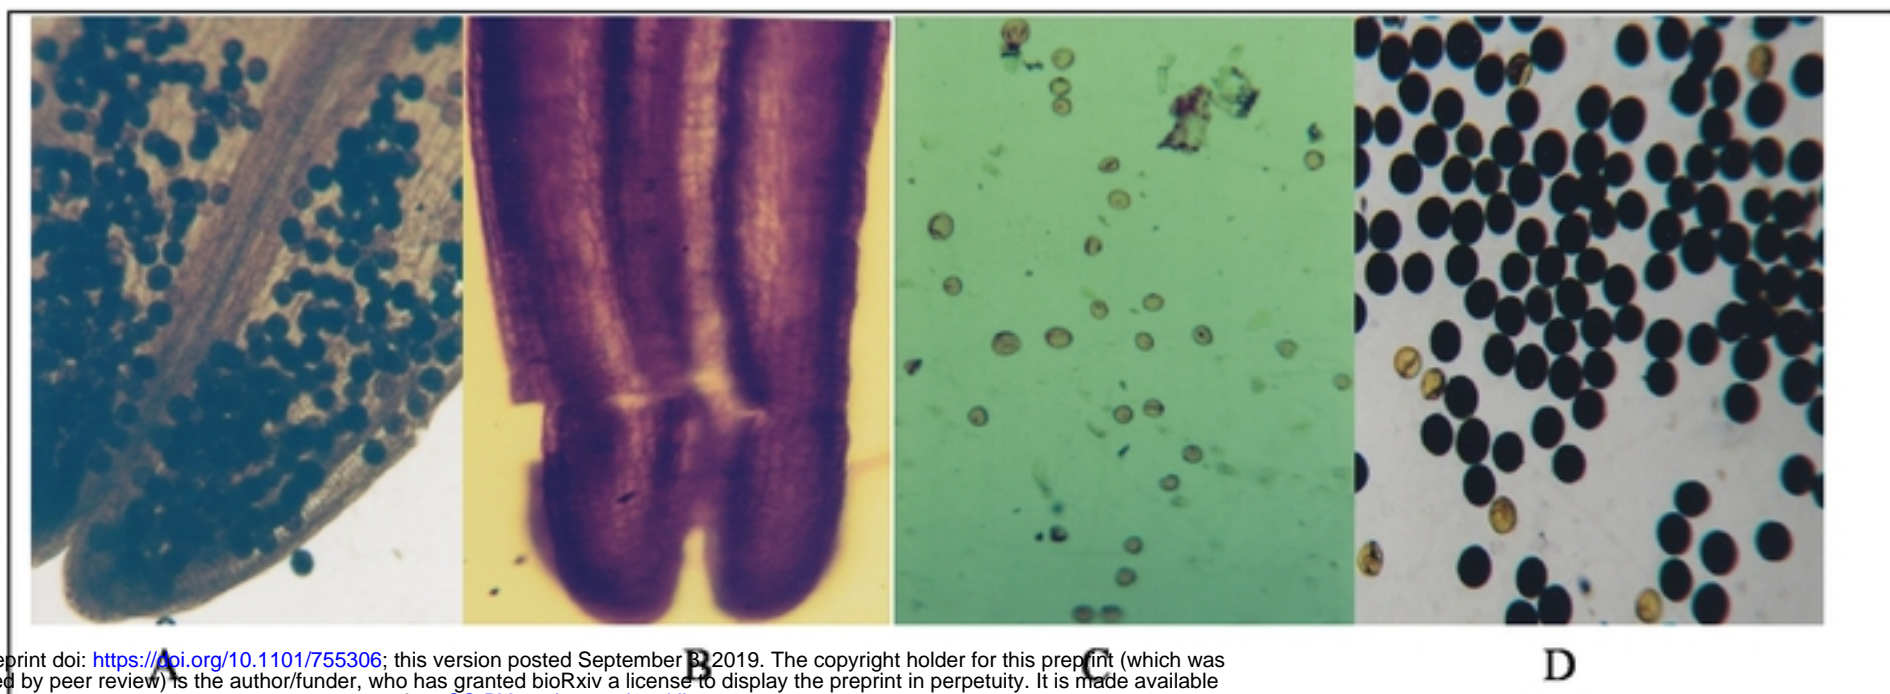

Fig 2: Comparison of pollen fertility (under X10 magnification) of plants grown in GH and OGH growth conditions. Figs A and B that of glumes take from line B370 and EGMS (P1) under GH growth conditions respectively. Figs C and D are that of P1 and B370 grown under GH growth conditions respectively.

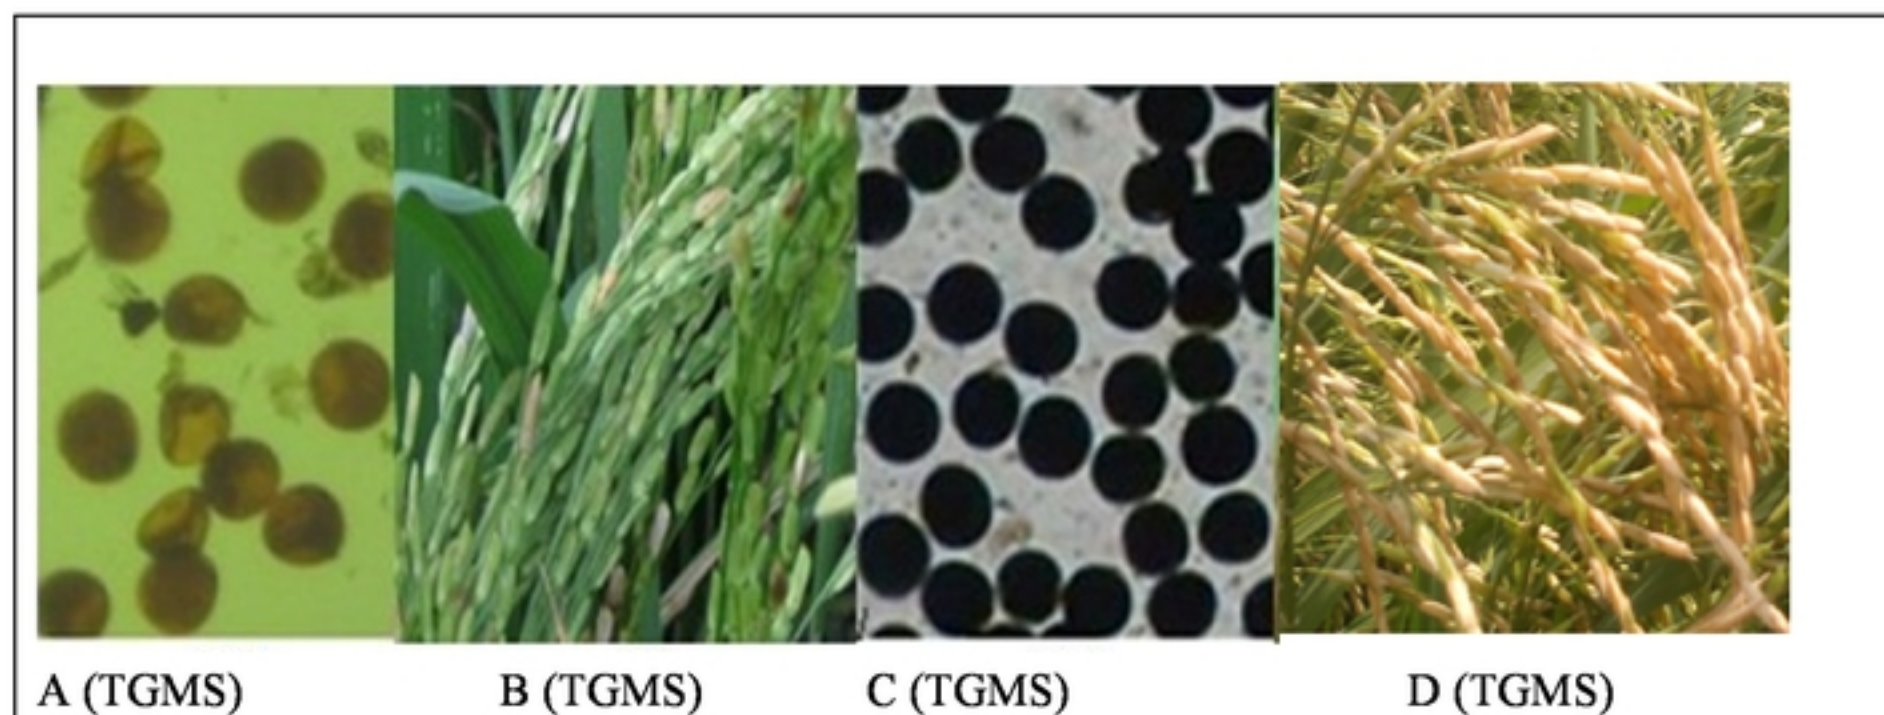

Fig. 3: Comparison of pollen and seed set in GH and OGH condition (under X10 magnification). Figure (A) and (C) show pollen grains from GH and OGH while (B) and (D) show spikelets from plants grown under GH and OGH growth conditions respectively.
